# Supplementary material
Source: PubMed Central journal article supplement (PMC5447400)
Supplement: supp_WNL.0000000000003992_e-figures.pdf [file supp_WNL.0000000000003992_e-figures.pdf]

**Figure e-1.** Localization in 3D of dystonin in normal differentiated iPSCs

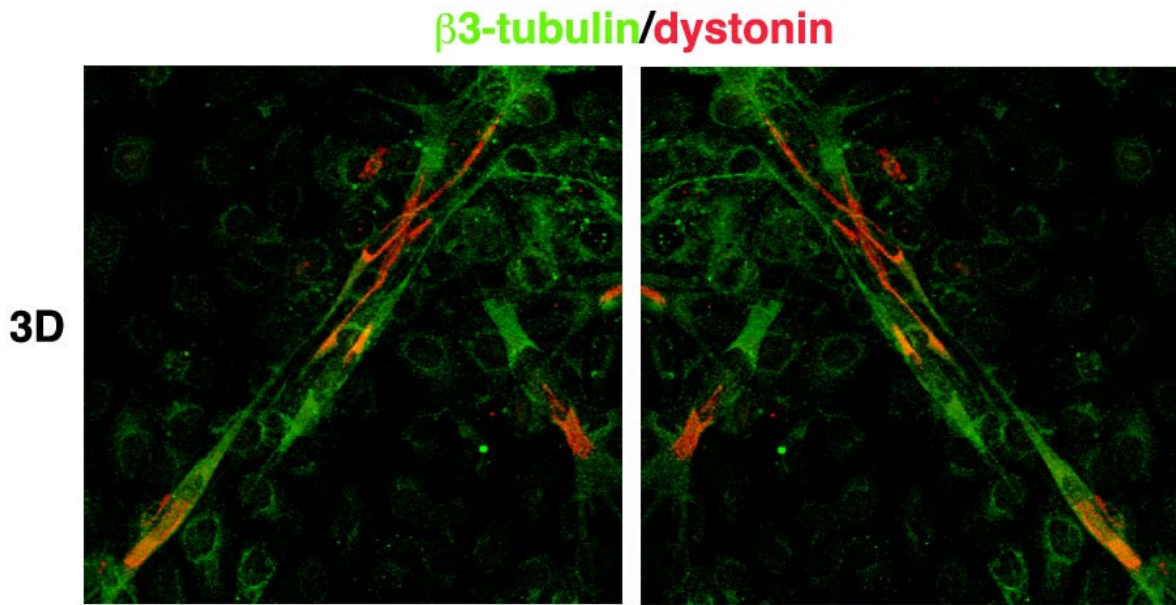

Confocal images of normal and affected differentiated iPSCs stained with  $\beta$ -tubulin (green) and dystonin (red). Images correspond to the 3D reconstruction of Z-planes acquired from the top to the bottom of the cells. The picture at right is rotated of 180° respect to picture at left.

**Figure e-2.** Analysis of the levels of DST mRNA isoforms in skin biopsies.

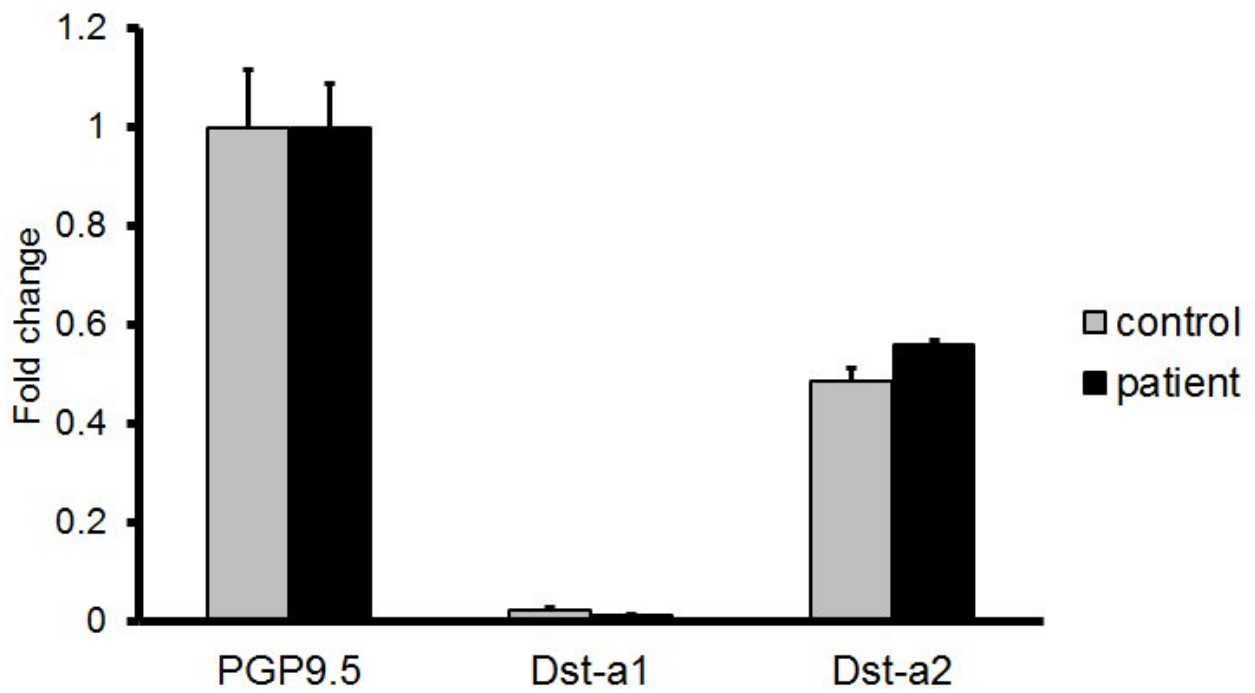

The measurement of the mRNAs encoding the DST-a1 and -a2 isoforms was performed by qPCR in the RNA isolated from the skin biopsies of DST patient and healthy donor (control). Data are expressed as mean of three replicates  $\pm$  SD relative to the expression of the neural marker PGP 9.5.
