# Supplementary material
Source: PubMed Central journal article supplement (PMC5447400)
Supplement: supp_WNL.0000000000003992_Table_e-1.pdf [file supp_WNL.0000000000003992_Table_e-1.pdf]

**Table e-1.** Electrophysiological findings.

|                                   | <b>II.1</b> | <b>II.2</b> | <b>II.4</b> | <b>Normal values</b> |
|-----------------------------------|-------------|-------------|-------------|----------------------|
| <b>Nerve conduction study</b>     |             |             |             |                      |
| <b>Ulnar nerve</b>                |             |             |             |                      |
| DML (ms)                          | 3           | 2.6         | 2.3         | ≤3.3                 |
| MNCV forearm (m/sec)              | 58          | 53          | 55          | ≥50                  |
| MNCV elbow (m/sec)                | <b>44</b>   | 56          | 47          | ≥45                  |
| dCMAP (mV)                        | 10.3        | 8.6         | 16          | ≥6                   |
| SNCV (m/sec)                      | NA          | NA          | NA          | ≥50                  |
| SAP (μV)                          | <b>NR</b>   | <b>NR</b>   | <b>NR</b>   | ≥10                  |
| <b>Median nerve</b>               |             |             |             |                      |
| DML (ms)                          | 4.1         | 3.8         | 3.8         | ≤4.1                 |
| MNCV (m/sec)                      | 48          | 50          | 50          | ≥50                  |
| dCMAP (mV)                        | 10.3        | 9.4         | 9.4         | ≥6                   |
| SNCV (m/sec)                      | <b>46</b>   | NA          | NA          | ≥50                  |
| SAP (μV)                          | <b>1.3</b>  | <b>NR</b>   | <b>NR</b>   | ≥10                  |
| <b>Peroneal nerve</b>             |             |             |             |                      |
| DML (ms)                          | 4.2         | 4.5         | NA          | ≤5                   |
| MNCV (m/sec)                      | <b>39</b>   | <b>35.5</b> | NA          | ≥41                  |
| dCMAP (mV)                        | <b>2.5</b>  | <b>0.1</b>  | <b>NR</b>   | ≥4                   |
| <b>Tibial nerve</b>               |             |             |             |                      |
| DML (ms)                          | 4           | NA          | 5           | ≤5                   |
| MNCV (m/sec)                      | 41          | NA          | 44          | ≥41                  |
| dCMAP (mV)                        | <b>1.8</b>  | <b>NR</b>   | <b>3.5</b>  | ≥4                   |
| <b>Sural nerve</b>                |             |             |             |                      |
| SNCV (m/sec)                      | NA          | NA          | NA          | ≥44                  |
| SAP (μV)                          | <b>NR</b>   | <b>NR</b>   | <b>NR</b>   | ≥4                   |
| <b>Superficial peroneal nerve</b> |             |             |             |                      |
| SNCV (m/sec)                      | NA          | NA          | NA          | ≥44                  |
| SAP (μV)                          | <b>NR</b>   | <b>NR</b>   | <b>NR</b>   | ≥4                   |

**Legend.** DML, distal motor latency; MNCV/SNCV, motor/sensory nerve conduction velocity; dCMAP/SAP, distal compound motor/sensory action potential amplitude; NA, not applicable; NR, no response. Abnormal values are reported in bold.
